# Supplementary material for: Aurora-A promotes chemoresistance in hepatocelluar carcinoma by targeting NF-kappaB/microRNA-21/PTEN signaling pathway
Source: PubMed Central journal article supplement (PMC4350360; doi:10.18632/oncotarget.2682), 2014-11-04
Supplement: oncotarget-05-12916-s001.pdf [file oncotarget-05-12916-s001.pdf]

# Aurora-A promotes chemoresistance in hepatocellular carcinoma by targeting NF-kappaB/microRNA-21/PTEN signaling pathway

## Supplementary Material

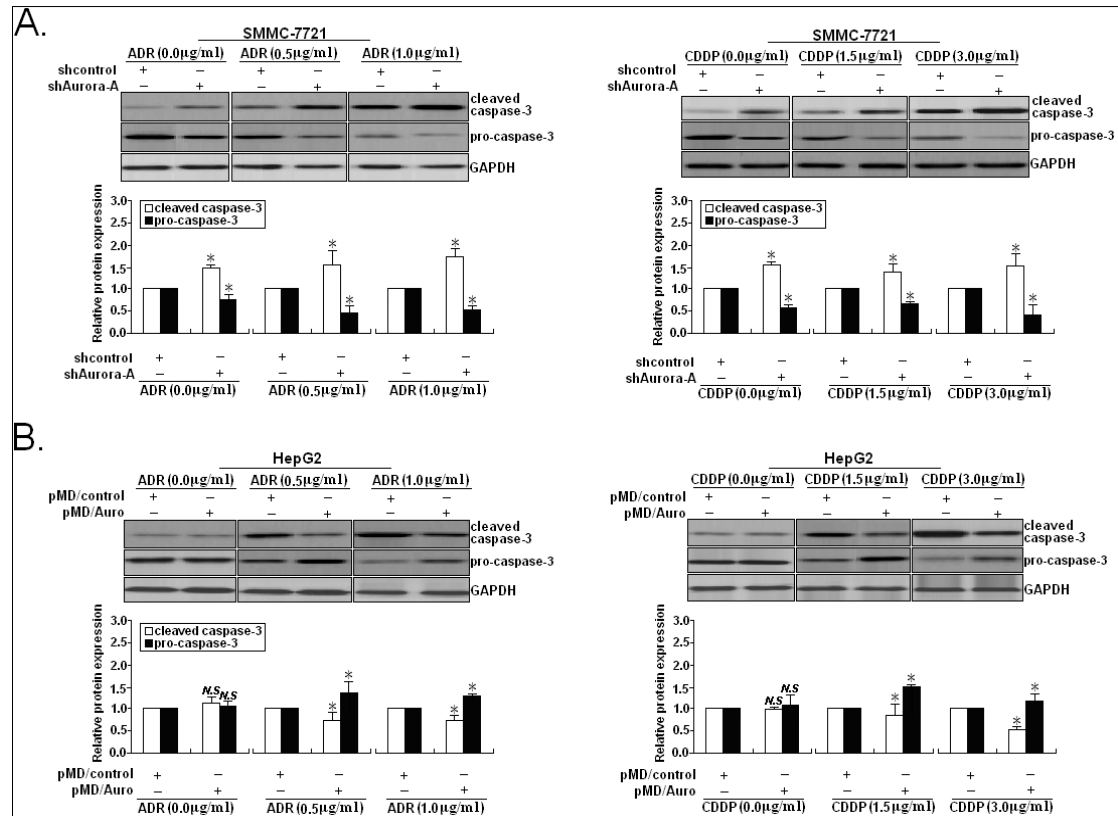

**Supporting Figure 1: Effects of Aurora-A expression on cleaved or total caspase-3 protein expression in HCC cells treated with ADR or CDDP.** (A) Western blotting detection of cleaved caspase-3 or total caspase-3 protein expression in SMMC-7721/shAurora-A or SMMC-7721/shcontrol cells treated with various concentrations of ADR (0.0, 1.0 and 2.0  $\mu\text{g/ml}$ ) or CDDP (0.0, 1.5 and 3.0  $\mu\text{g/ml}$ ). (B) Western blotting detection of cleaved caspase-3 or total caspase-3 protein expression in SMMC-7721/shAurora-A or SMMC-7721/shcontrol cells treated with various concentrations of ADR (0.0, 0.5 and 1.0  $\mu\text{g/ml}$ ) or CDDP (0.0, 1.0 and 1.5  $\mu\text{g/ml}$ ). GAPDH was used as an internal control. Data were presented as mean  $\pm$  SD of at least three independent experiments. *N.S.*,  $P>0.05$ ;  $*P<0.05$ .

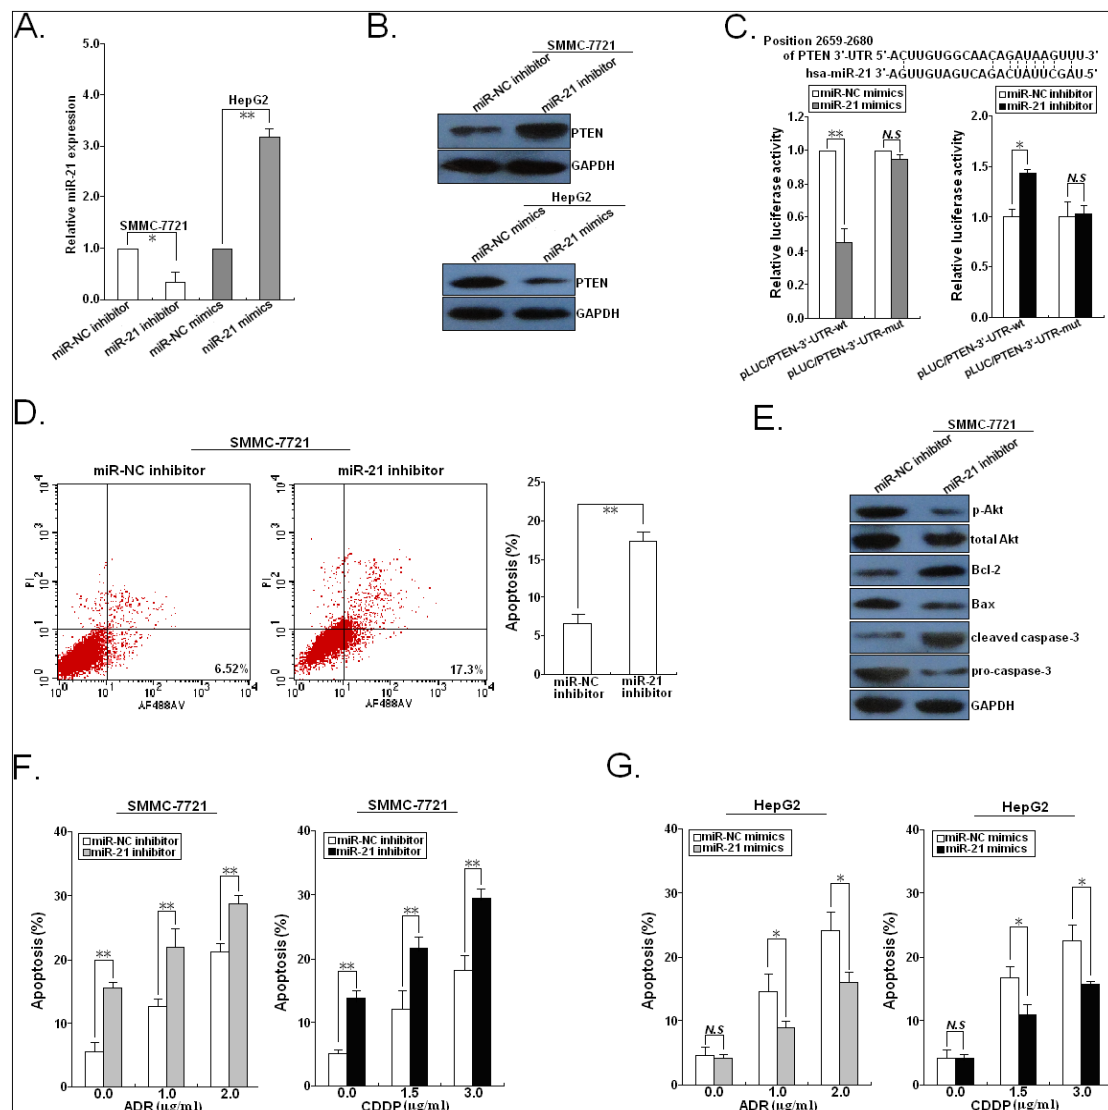

**Supporting Figure 2: PTEN was a functional target of miR-21 in HCC cells.** (A) qRT-PCR detection of miR-21 expression in miR-21 inhibitor (or miR-NC inhibitor)-transfected SMMC-7721 cells or miR-21 mimics (or miR-NC mimics)-transfected HepG2 cells. U6 was used as an internal control. (B) Western blotting detection of PTEN protein expression in miR-21 inhibitor (or miR-NC inhibitor)-transfected SMMC-7721 cells or miR-21 mimics (or miR-NC mimics)-transfected HepG2 cells. GAPDH was used as an internal control. (C) Relative luciferase activity was analyzed after wildtype (pLUC/PTEN-3'-UTR-wt) or mutant (pLUC/PTEN-3'-UTR-mut) 3'-UTR reporter plasmids were co-transfected with miR-21 (or miR-NC) mimics or miR-21 (or miR-NC) inhibitor in HepG2 cells. The histogram shows the mean±SD of the normalized luciferase activity from three independent experiments. (D) Flow cytometry detection of apoptosis in miR-21 or miR-NC inhibitor-transfected SMMC-7721 cells. (E) Western blotting detection of the expression of p-Akt, total Akt, Bcl-2, Bax, cleaved caspase-3 and total caspase-3 proteins in miR-21 or miR-NC inhibitor-transfected SMMC-7721 cells. GAPDH was used as an internal control. (F) Flow cytometry detection of apoptosis in miR-21 or miR-NC inhibitor-transfected SMMC-

7721 cells treated with various concentrations of ADR (0.0, 1.0 and 2.0 µg/ml) or CDDP (0.0, 1.5 and 3.0 µg/ml). (G) Flow cytometry detection of apoptosis in miR-21 or miR-NC mimics-transfected HepG2 cells treated with various concentrations of ADR (0.0, 0.5 and 1.0 µg/ml) or CDDP (0.0, 1.0 and 1.5 µg/ml). **Data were presented as mean ± SD of at least three independent experiments.** *N.S.*, *P*>0.05; \**P*<0.05; \*\**P*<0.01.

**Supporting Table 1.** Aurora-A protein expression levels were detected by Western blotting in 44 pairs of HCCs and corresponding nontumor liver tissues (NTs).

| Tissue Group | Total No. of Tissues | No. with Aurora-A overexpression | Ratio (%) | <i>P</i> -value |
|--------------|----------------------|----------------------------------|-----------|-----------------|
| HCC          | 44                   | 32                               | 72.7      | <0.001          |
| NT           | 44                   | 8                                | 18.2      |                 |

**Supporting Table 2.** Aurora-A protein expression levels were detected by immunohistochemistry assay in 44 pairs of HCCs and corresponding nontumor liver tissues (NTs).

| Tissue Group | Total No. of Tissues | No. with Aurora-A overexpression | Ratio (%) | <i>P</i> -value |
|--------------|----------------------|----------------------------------|-----------|-----------------|
| HCC          | 44                   | 26                               | 59.1      | <0.001          |
| NT           | 44                   | 12                               | 27.3      |                 |

**Supporting Table 3.** Correlation of Aurora-A with clinicopathologic characteristics of HCC patients.

| Characteristics       | Aurora-A immunostaining |                 | P-value |
|-----------------------|-------------------------|-----------------|---------|
|                       | Positive (n=28)         | Negative (n=16) |         |
| Gender                |                         |                 | 0.728   |
| Female                | 16                      | 10              |         |
| Male                  | 12                      | 6               |         |
| Age (years)           |                         |                 | 0.572   |
| <55                   | 5                       | 4               |         |
| ≥55                   | 23                      | 12              |         |
| Alcohol intake        |                         |                 | 0.463   |
| No                    | 10                      | 4               |         |
| Yes                   | 18                      | 12              |         |
| Liver function        |                         |                 | 0.864   |
| Child-Pugh A          | 13                      | 7               |         |
| Child-Pugh B          | 15                      | 9               |         |
| AFP (ng/L)            |                         |                 | 0.820   |
| ≤400                  | 15                      | 8               |         |
| >400                  | 13                      | 8               |         |
| TNM stage             |                         |                 | 0.019*  |
| I/II                  | 9                       | 11              |         |
| III                   | 19                      | 5               |         |
| Lymph node metastasis |                         |                 | 0.002*  |
| No                    | 11                      | 14              |         |
| Yes                   | 17                      | 2               |         |
| Edmondson grade       |                         |                 | 0.954   |
| I+II                  | 12                      | 7               |         |
| III                   | 16                      | 9               |         |

NOTE: AFP, alpha-fetoprotein; TNM, tumor-node-metastasis. \* $P < 0.05$ .

**Support Table 4.** Multivariate survival analyses of 5-year RFS and OS in HCC patients

HR: hazard ratio; 95% CI: 95% confidence interval. AFP, alpha-fetoprotein; TNM, tumor-node-metastasis. \* $P < 0.05$ .

| Factor                      | Unfavorable/favorable       | 5-year RFS |       |             | 5-year OS |       |             |
|-----------------------------|-----------------------------|------------|-------|-------------|-----------|-------|-------------|
|                             |                             | P-value    | HR    | 95% CI      | P-value   | HR    | 95% CI      |
| Gender                      | Male / Female               | 0.546      | 1.023 | 0.756-1.324 | 0.177     | 0.873 | 0.542-1.388 |
| Age                         | $\geq 55$ / $< 55$          | 0.298      | 1.456 | 0.695-2.123 | 0.430     | 1.278 | 0.818-1.708 |
| Alcohol intake              | Yes / No                    | 0.404      | 1.333 | 0.812-1.787 | 0.182     | 0.782 | 0.459-1.027 |
| Liver function              | Child-Pugh B / Child-Pugh A | 0.612      | 0.988 | 0.701-1.338 | 0.098     | 1.562 | 0.772-2.123 |
| AFP (ng/L)                  | $> 400$ / $< 400$           | 0.202      | 0.786 | 0.559-1.108 | 0.227     | 1.662 | 0.911-1.899 |
| TNM stage                   | III / I+II                  | 0.016*     | 2.128 | 1.878-3.025 | 0.008*    | 1.354 | 1.022-2.118 |
| Lymph node metastasis       | Yes / No                    | 0.006*     | 1.802 | 1.234-2.797 | 0.035*    | 2.033 | 1.568-3.827 |
| Edmondson grade             | III / I+II                  | 0.028*     | 1.777 | 1.188-3.085 | 0.108     | 1.611 | 0.809-2.177 |
| Aurora-A protein expression | Positive / Negative         | 0.012*     | 2.055 | 1.735-3.455 | 0.005*    | 1.554 | 1.232-2.598 |

**Supporting Table 5:** Primers of qRT-PCR

| Name     | Primer                                                                                                                             |
|----------|------------------------------------------------------------------------------------------------------------------------------------|
| miR-21   | RT: 5'-GTCGTATCCAGTGCAGGGTCCGAGGTATTCGCACTGGATA<br>CGACTCAACA-3'<br>F: 5'-GTGCAGGGTCCGAGGT-3'<br>R: 5'-GCCGCTAGCTTATCAGACTGATGT-3' |
| U6       | RT: 5'-AACGCTTCACGAATTTGCGT-3'<br>F: 5'-CTCGCTTCGGCAGCACA-3'<br>R: 5'-AACGCTTCACGAATTTGCGT-3'                                      |
| Aurora-A | F: 5'-AATGATTGAAGGTCGGATGC-3'<br>R: 5'-TTCTCTGAGCATTGGCCTCT-3'                                                                     |
| p65      | F: 5'-TCTCCCTGGTCACCAAGGAC-3'<br>R: 5'-TCATAGAAGCCATCCCAGGC-3'                                                                     |
| GAPDH    | F: 5'-CCAAAAGGGTCATCATCTCTGC-3'<br>R: 5'-TGCTAAGCAGTTGG TGGTGCAG-3'                                                                |

RT: reverse transcriptase; F: forward; R: reverse
